# Supplementary material for: Ferrocene-driven single-chain polymer compaction
Source: Royal Society of Chemistry journal article supplement (doi:10.1039/d3cc00736g), 2023-01-01
Supplement: d3cc00736g2.pdf [file d3cc00736g2.pdf]

Cartesian coordinates are listed in xyz format (Angström).

Energies are listed in Hartree.

All given structures were optimized with the PBE0

functional (grid m3) and dhf-TZVP basis sets.

For computational details see Supporting Information (PDF).

-----  
2-Ferrocenyl-1,10-phenanthroline  
-----

41

Energy = -2220.291442125

N 0.6464617 0.1881133 -0.8755112

N 0.4687933 -1.7223149 -2.8295525

Fe -0.0060567 -0.2549096 2.7561553

C -1.4572411 -1.5494571 2.1436711

H -1.3244030 -2.2736000 1.3550046

C -1.1734434 -1.7450788 3.5221554

H -0.7974696 -2.6522850 3.9695793

C -1.4265063 -0.5233822 4.2015669

H -1.2808277 -0.3418916 5.2553863

C -1.8686883 0.4274881 3.2428625

H -2.1175177 1.4588999 3.4402105

C -1.8876452 -0.2076658 1.9726316

H -2.1354285 0.2599045 1.0315663

C 1.6474162 -0.6995504 1.6520356

C 1.9523351 -0.7905160 3.0310217

H 2.2886066 -1.6762188 3.5479429

C 1.6969925 0.4741707 3.6272932

H 1.8067115 0.7180248 4.6728300

C 1.2350249 1.3520478 2.6146339

H 0.9335553 2.3771223 2.7657980

|   |            |            |            |
|---|------------|------------|------------|
| C | 1.2039030  | 0.6289844  | 1.3823762  |
| C | 0.7279683  | 1.0929700  | 0.0810981  |
| C | 0.3710974  | 2.4411399  | -0.1283777 |
| H | 0.4633223  | 3.1606666  | 0.6748192  |
| C | -0.0851837 | 2.8193770  | -1.3589335 |
| H | -0.3675216 | 3.8487471  | -1.5549285 |
| C | -0.1888727 | 1.8690972  | -2.3873450 |
| C | 0.1997236  | 0.5458734  | -2.0822004 |
| C | -0.6588837 | 2.2037472  | -3.6883767 |
| H | -0.9472874 | 3.2307149  | -3.8867060 |
| C | -0.7443218 | 1.2639382  | -4.6571708 |
| H | -1.1020836 | 1.5196104  | -5.6487191 |
| C | -0.3660075 | -0.0852283 | -4.3965062 |
| C | 0.1063375  | -0.4631918 | -3.1185723 |
| C | -0.4456003 | -1.0815279 | -5.3811573 |
| H | -0.8036971 | -0.8228858 | -6.3722890 |
| C | -0.0703042 | -2.3623110 | -5.0748344 |
| H | -0.1174693 | -3.1571909 | -5.8090839 |
| C | 0.3813167  | -2.6277502 | -3.7749463 |
| H | 0.6843277  | -3.6366258 | -3.5046147 |
| H | 1.6995831  | -1.4824485 | 0.9124270  |

-----  
Monolithiated 2-ferrocenyl-9,10-dihydro-9-n-butyl-1,10-phenanthroline  
(Lithium at N)  
-----

55

Energy = -2385.563776088

|    |            |            |            |
|----|------------|------------|------------|
| N  | -0.1601263 | -0.0058256 | -0.4130939 |
| N  | -1.4033873 | -0.6215298 | -2.7400030 |
| Fe | -0.5155154 | -0.5553218 | 3.6102798  |
| C  | -2.2539176 | 0.4754511  | 3.9080449  |

|   |            |            |            |
|---|------------|------------|------------|
| H | -3.1361096 | 0.3883364  | 3.2925919  |
| C | -1.9483628 | -0.3151310 | 5.0479301  |
| H | -2.5583777 | -1.1082737 | 5.4519703  |
| C | -0.6815878 | 0.0966769  | 5.5399435  |
| H | -0.1597742 | -0.3282807 | 6.3835201  |
| C | -0.2046182 | 1.1406844  | 4.7027351  |
| H | 0.7429050  | 1.6477091  | 4.8006843  |
| C | -1.1764042 | 1.3744438  | 3.6941833  |
| H | -1.0900807 | 2.0782498  | 2.8802175  |
| C | -0.7741784 | -1.6904018 | 1.9424065  |
| C | -0.5117561 | -2.5231783 | 3.0618181  |
| H | -1.1743770 | -3.2741175 | 3.4637793  |
| C | 0.7543523  | -2.1577269 | 3.5890314  |
| H | 1.2292308  | -2.5911455 | 4.4555364  |
| C | 1.2720712  | -1.0985441 | 2.8007697  |
| H | 2.2172440  | -0.6001042 | 2.9505721  |
| C | 0.3319880  | -0.8032370 | 1.7690332  |
| C | 0.4570583  | 0.2201298  | 0.7314870  |
| C | 1.2002972  | 1.3979516  | 0.9392964  |
| H | 1.6940749  | 1.5593414  | 1.8890632  |
| C | 1.2547039  | 2.3327016  | -0.0551837 |
| H | 1.8104037  | 3.2539825  | 0.0886395  |
| C | 0.5835389  | 2.1299700  | -1.2778308 |
| C | -0.1185301 | 0.9033325  | -1.4145280 |
| C | 0.5819275  | 3.0646963  | -2.3267726 |
| H | 1.1189790  | 3.9990257  | -2.2185318 |
| C | -0.1261255 | 2.7697120  | -3.4681381 |
| H | -0.1646332 | 3.4956405  | -4.2758010 |
| C | -0.8104322 | 1.5643147  | -3.6458990 |
| C | -0.8041207 | 0.5646183  | -2.6427813 |
| C | -1.6247660 | 1.2959383  | -4.8058877 |
| H | -1.7871024 | 2.0968839  | -5.5217613 |

C -2.2073796 0.1067586 -4.9675148  
H -2.8580759 -0.0817483 -5.8159889  
C -1.9567570 -1.0309034 -4.0212431  
H -1.6981683 -1.6638298 1.3823270  
C -1.0688529 -2.1039418 -4.6805469  
C 0.3362403 -1.6366528 -5.0082238  
H -1.5660421 -2.4589749 -5.5928757  
H -1.0192540 -2.9657092 -4.0004526  
C 1.2008619 -2.7227295 -5.6269109  
H 0.8140325 -1.2669203 -4.0944071  
H 0.2830505 -0.7799951 -5.6887763  
C 2.6074540 -2.2468625 -5.9467859  
H 0.7210496 -3.0924799 -6.5408233  
H 1.2496464 -3.5811869 -4.9457489  
H 2.5870873 -1.4105063 -6.6508987  
H 3.2131202 -3.0411647 -6.3899255  
H 3.1188757 -1.9002101 -5.0444987  
H -2.9211626 -1.5276937 -3.8292151  
Li -1.0903471 -1.5292219 -1.1444725

-----  
Dilithiated 2-ferrocenyl-9,10-dihydro-9-n-butyl-1,10-phenanthroline,  
second Li at substituted ring, not in proximity to N atoms  
-----

55

Energy = -2392.448894876

N 0.0146206 0.2446888 0.4254907  
N -1.2381138 -0.3875065 -1.8804597  
Fe -0.3571306 -0.3597573 4.4171446  
C -2.0753276 0.7249594 4.6958906  
H -2.9670289 0.6682261 4.0903360  
C -1.7905040 -0.0600406 5.8545223

|    |            |            |            |
|----|------------|------------|------------|
| H  | -2.4988753 | -0.6979112 | 6.3780213  |
| C  | -0.5067625 | 0.3302831  | 6.3428435  |
| H  | -0.0027211 | -0.0774155 | 7.2056623  |
| C  | -0.0110284 | 1.3470148  | 5.4900875  |
| H  | 0.9481898  | 1.8323713  | 5.5810761  |
| C  | -0.9763105 | 1.5892876  | 4.4760666  |
| H  | -0.8711133 | 2.2779307  | 3.6516953  |
| C  | -0.5751621 | -1.4884736 | 2.7351705  |
| C  | -0.3785079 | -2.3806262 | 3.8386573  |
| Li | -1.7555051 | -2.4183954 | 5.1959144  |
| C  | 0.8986391  | -1.9760850 | 4.3598368  |
| H  | 1.3828925  | -2.4021269 | 5.2295539  |
| C  | 1.4397654  | -0.8851813 | 3.6250113  |
| H  | 2.3768941  | -0.3799897 | 3.8091410  |
| C  | 0.5173021  | -0.5725220 | 2.5876374  |
| C  | 0.6372912  | 0.4672629  | 1.5675771  |
| C  | 1.3708719  | 1.6528650  | 1.7718066  |
| H  | 1.8790892  | 1.8125206  | 2.7144474  |
| C  | 1.4044831  | 2.5937161  | 0.7811635  |
| H  | 1.9536801  | 3.5192990  | 0.9236176  |
| C  | 0.7228822  | 2.3907975  | -0.4364389 |
| C  | 0.0367613  | 1.1564923  | -0.5708157 |
| C  | 0.6956484  | 3.3283343  | -1.4838972 |
| H  | 1.2203718  | 4.2703092  | -1.3805827 |
| C  | -0.0214134 | 3.0251790  | -2.6175938 |
| H  | -0.0801352 | 3.7526960  | -3.4227452 |
| C  | -0.6902007 | 1.8096226  | -2.7918504 |
| C  | -0.6566239 | 0.8080751  | -1.7912595 |
| C  | -1.5179963 | 1.5316122  | -3.9396510 |
| H  | -1.7079198 | 2.3324648  | -4.6489633 |
| C  | -2.0815001 | 0.3320787  | -4.0962264 |
| H  | -2.7438427 | 0.1350235  | -4.9337402 |

C -1.7896369 -0.8048376 -3.1599691  
H -1.4869236 -1.4177557 2.1500945  
C -0.8761438 -1.8467390 -3.8344871  
C 0.5115951 -1.3359720 -4.1716967  
H -1.3708884 -2.2098422 -4.7451966  
H -0.7947298 -2.7106296 -3.1604564  
C 1.4006282 -2.3899994 -4.8107108  
H 0.9882138 -0.9623803 -3.2589740  
H 0.4266616 -0.4745008 -4.8427259  
C 2.7883937 -1.8687621 -5.1423729  
H 0.9213230 -2.7654765 -5.7226634  
H 1.4834313 -3.2525855 -4.1382989  
H 2.7343046 -1.0270883 -5.8383605  
H 3.4128851 -2.6402498 -5.5996455  
H 3.2993772 -1.5146979 -4.2427363  
H -2.7371072 -1.3315413 -2.9633217  
Li -0.9070433 -1.2940212 -0.2726262

-----  
Dilithiated 2-ferrocenyl-9,10-dihydro-9-n-butyl-1,10-phenanthroline,  
second Li at substituted ring, in spacial proximity to N atoms  
-----

55

Energy = -2392.481732541

N 0.6800272 0.2326135 -0.2562154  
N -1.0542704 -0.5191259 -1.9479892  
Fe -0.4967933 -0.6705665 2.9129427  
C -2.2981328 0.1016087 2.2918367  
H -2.8256117 0.0760447 1.3433944  
C -2.4902517 -0.8151224 3.3657054  
H -3.0764115 -1.7201380 3.3301825  
C -1.7645348 -0.3314611 4.4825410

|    |            |            |            |
|----|------------|------------|------------|
| H  | -1.6902725 | -0.8148778 | 5.4442897  |
| C  | -1.1155924 | 0.8740776  | 4.1018484  |
| H  | -0.4636651 | 1.4669543  | 4.7245396  |
| C  | -1.4435315 | 1.1450339  | 2.7499439  |
| H  | -1.0929594 | 1.9831245  | 2.1658440  |
| C  | 0.3549458  | -1.7725993 | 1.3485468  |
| C  | 0.2370884  | -2.5505414 | 2.5371315  |
| H  | -0.3470064 | -3.4566854 | 2.6292176  |
| C  | 0.9289352  | -1.9480896 | 3.6276650  |
| H  | 0.9666651  | -2.3087169 | 4.6457889  |
| C  | 1.5247401  | -0.7524428 | 3.1527210  |
| H  | 2.0915481  | -0.0477737 | 3.7441480  |
| C  | 1.1850368  | -0.6428174 | 1.7758990  |
| C  | 1.3658039  | 0.4727170  | 0.8397705  |
| C  | 2.0282478  | 1.7128861  | 0.9537330  |
| H  | 2.6265708  | 1.9429024  | 1.8268281  |
| C  | 1.8887362  | 2.6398349  | -0.0597887 |
| H  | 2.3953066  | 3.5962686  | 0.0264861  |
| C  | 1.0693338  | 2.4025062  | -1.1904821 |
| C  | 0.4699858  | 1.1310292  | -1.2108232 |
| C  | 0.7509242  | 3.2844113  | -2.2465679 |
| H  | 1.1932983  | 4.2718166  | -2.2952812 |
| C  | -0.1629356 | 2.8709763  | -3.1924003 |
| H  | -0.4357189 | 3.5584468  | -3.9881748 |
| C  | -0.8027968 | 1.6136675  | -3.1776614 |
| C  | -0.4913583 | 0.6906491  | -2.1710915 |
| C  | -1.8817089 | 1.2318539  | -4.0587595 |
| H  | -2.2676912 | 1.9558386  | -4.7702173 |
| C  | -2.4345259 | 0.0200797  | -3.9497301 |
| H  | -3.2782659 | -0.2544557 | -4.5758205 |
| C  | -1.9134563 | -1.0373507 | -3.0108781 |
| Li | -1.1306209 | -0.6328794 | 0.2247159  |

C -1.2036447 -2.1540684 -3.7973417  
C 0.0554891 -1.7129614 -4.5196722  
H -1.9110435 -2.5828594 -4.5193149  
H -0.9638404 -2.9619111 -3.0913924  
C 0.7532787 -2.8448424 -5.2557472  
H 0.7523603 -1.2624800 -3.8020366  
H -0.1945134 -0.9153396 -5.2269098  
C 2.0155636 -2.3963847 -5.9715403  
H 0.0582991 -3.2878250 -5.9786974  
H 0.9966715 -3.6456660 -4.5470848  
H 1.7929827 -1.6218549 -6.7101567  
H 2.5006082 -3.2248872 -6.4928397  
H 2.7394920 -1.9767920 -5.2672101  
H -2.7821630 -1.5207745 -2.5400511  
Li 0.4012479 -1.6480509 -0.8435037

-----  
Dilithiated 2-ferrocenyl-9,10-dihydro-9-n-butyl-1,10-phenanthroline,  
second Li at unsubstituted ring, in spacial proximity to N atoms  
-----

55

Energy = -2392.499395002

N 0.6076563 0.3545468 -0.1195141  
N -1.4140906 0.1077491 -1.8560176  
Fe -0.5391048 -0.9507583 2.7451326  
C -2.1382657 -0.4696829 1.4525399  
Li -2.5669020 0.4801328 -0.3285385  
C -2.4241607 -1.6199948 2.2641297  
H -2.6390198 -2.6120101 1.8867684  
C -2.3377803 -1.3093452 3.6493807  
H -2.4689154 -1.9951455 4.4739464  
C -1.9937126 0.0614226 3.7508673



|   |            |            |            |
|---|------------|------------|------------|
| H | -1.8192897 | 0.6086165  | 4.6660248  |
| C | -1.8677373 | 0.5598802  | 2.4238902  |
| H | -1.5481125 | 1.5708726  | 2.1962928  |
| C | 0.9969142  | -1.8607373 | 1.7541780  |
| C | 0.8096609  | -2.4691715 | 3.0219515  |
| H | 0.5619454  | -3.5045861 | 3.1977711  |
| C | 0.9843687  | -1.4706393 | 4.0141816  |
| H | 0.8698029  | -1.6082996 | 5.0783594  |
| C | 1.2897171  | -0.2459669 | 3.3641087  |
| H | 1.4299702  | 0.7108539  | 3.8439924  |
| C | 1.2996014  | -0.4779377 | 1.9620468  |
| C | 1.4463118  | 0.5032483  | 0.8830243  |
| C | 2.3975522  | 1.5409202  | 0.8810992  |
| H | 3.0890910  | 1.6400545  | 1.7084953  |
| C | 2.4535280  | 2.3852338  | -0.1976232 |
| H | 3.1976375  | 3.1746360  | -0.2341878 |
| C | 1.5465427  | 2.2539739  | -1.2681693 |
| C | 0.5971840  | 1.2109934  | -1.1531455 |
| C | 1.5184987  | 3.0866057  | -2.4064714 |
| H | 2.2491117  | 3.8792315  | -2.5146273 |
| C | 0.5485350  | 2.8801542  | -3.3523410 |
| H | 0.5083551  | 3.5239864  | -4.2260839 |
| C | -0.4362087 | 1.8818382  | -3.2292908 |
| C | -0.4494996 | 1.0282117  | -2.1160808 |
| C | -1.5472150 | 1.7620868  | -4.1439821 |
| H | -1.6778108 | 2.5218024  | -4.9090725 |
| C | -2.4197313 | 0.7579563  | -4.0197630 |
| H | -3.2757652 | 0.6796719  | -4.6826425 |
| C | -2.2159017 | -0.3277151 | -2.9987802 |
| H | 0.9915582  | -2.3655375 | 0.7976111  |
| C | -1.6521977 | -1.6057577 | -3.6433391 |
| C | -0.2399209 | -1.4807400 | -4.1838134 |

H -2.3302448 -1.9143152 -4.4505621  
H -1.6859098 -2.4041532 -2.8894888  
C 0.2605028 -2.7586828 -4.8367698  
H 0.4389971 -1.2022592 -3.3706016  
H -0.1966705 -0.6611007 -4.9094359  
C 1.6810855 -2.6348919 -5.3599817  
H -0.4120192 -3.0337041 -5.6577336  
H 0.2048715 -3.5821880 -4.1144835  
H 1.7561580 -1.8385360 -6.1057492  
H 2.0222607 -3.5617036 -5.8269407  
H 2.3771795 -2.3918900 -4.5524299  
H -3.2087922 -0.6201382 -2.6185251  
Li -0.8197491 -0.9440916 -0.1592663

-----  
Lithiated 2-ferrocenyl-9,10-dihydro-9-n-butyl-10-(4-ethylbenzyl)-1,10-  
phenanthroline, Li at substituted ring, in spacial proximity to N atoms  
-----

74

Energy = -2734.236344597

Fe -1.0266708 -2.7468588 -0.6871935  
C -2.0483932 -2.9575951 -2.4461117  
H -1.6193891 -3.2874824 -3.3798996  
C -2.6135083 -3.7921991 -1.4438764  
H -2.6847619 -4.8684719 -1.4798452  
C -3.0315229 -2.9643834 -0.3678661  
H -3.4694475 -3.3026116 0.5585156  
C -2.7297272 -1.6174533 -0.7053913  
H -2.8983362 -0.7554554 -0.0787503  
C -2.1207371 -1.6144271 -1.9882694  
H -1.7389438 -0.7477316 -2.5077849  
C 0.9036282 -3.2565580 -1.0067230

|    |            |            |            |
|----|------------|------------|------------|
| C  | 0.3553924  | -4.0855228 | -0.0006453 |
| H  | 0.2515218  | -5.1601405 | -0.0578444 |
| C  | -0.0753388 | -3.2377270 | 1.0670418  |
| H  | -0.5850245 | -3.6086172 | 1.9479561  |
| C  | 0.1827406  | -1.8659705 | 0.7925773  |
| Li | 0.1092802  | 0.1116245  | 1.1564842  |
| C  | 0.8033752  | -1.9074122 | -0.5179954 |
| H  | 1.3019292  | -3.5941548 | -1.9530376 |
| N  | 0.8553108  | 0.4498605  | -0.6473060 |
| N  | 0.3434306  | 2.7373178  | 0.7674101  |
| C  | 1.0715542  | -0.6974907 | -1.2736846 |
| C  | 1.4883275  | -0.7099827 | -2.6324217 |
| H  | 1.6953064  | -1.6562100 | -3.1142549 |
| C  | 1.5714947  | 0.4597123  | -3.3225300 |
| H  | 1.8556434  | 0.4653249  | -4.3699573 |
| C  | 1.2571228  | 1.6841214  | -2.6899618 |
| C  | 0.9294580  | 1.6175378  | -1.3151359 |
| C  | 1.2171142  | 2.9234401  | -3.3547225 |
| H  | 1.4682473  | 2.9666766  | -4.4088400 |
| C  | 0.8373965  | 4.0510035  | -2.6812343 |
| H  | 0.7787993  | 5.0036488  | -3.1964503 |
| C  | 0.5189514  | 4.0046424  | -1.3080527 |
| C  | 0.5992403  | 2.8058343  | -0.6214268 |
| C  | 0.0827362  | 5.1834242  | -0.5833991 |
| H  | 0.1885960  | 6.1529376  | -1.0587370 |
| C  | -0.4697369 | 5.0617244  | 0.6230289  |
| H  | -0.8232423 | 5.9306715  | 1.1682428  |
| C  | -0.6296664 | 3.7141305  | 1.2654640  |
| C  | -2.0638062 | 3.1842712  | 1.1733137  |
| C  | -2.5317909 | 2.7797776  | -0.2140178 |
| H  | -2.7352391 | 3.9543177  | 1.5735678  |
| H  | -2.1438513 | 2.3217071  | 1.8463530  |

|   |            |            |            |
|---|------------|------------|------------|
| C | -3.9866896 | 2.3394274  | -0.2323118 |
| H | -1.9074756 | 1.9625261  | -0.5897329 |
| H | -2.3958030 | 3.6147647  | -0.9097157 |
| C | -4.4515580 | 1.9026116  | -1.6104784 |
| H | -4.6176128 | 3.1601627  | 0.1292210  |
| H | -4.1259998 | 1.5169808  | 0.4795698  |
| H | -4.3383922 | 2.7122554  | -2.3368058 |
| H | -5.5022452 | 1.6050272  | -1.6028684 |
| H | -3.8708765 | 1.0497007  | -1.9704243 |
| H | -0.4137768 | 3.8368915  | 2.3312886  |
| C | 1.4873152  | -0.8434206 | 4.1589118  |
| C | 2.4719854  | -0.6872118 | 3.1911567  |
| C | 2.5080570  | 0.4359943  | 2.3824111  |
| C | 1.5634494  | 1.4494955  | 2.5168695  |
| C | 0.5810595  | 1.3003930  | 3.4959850  |
| C | 0.5465225  | 0.1705361  | 4.2995826  |
| H | 3.1982277  | -1.4774994 | 3.0354617  |
| H | 3.2611754  | 0.5144738  | 1.6056865  |
| H | -0.1724010 | 2.0684733  | 3.6330182  |
| H | -0.2372178 | 0.0690260  | 5.0432068  |
| C | 1.4431985  | -2.0725623 | 5.0154903  |
| C | 2.4580322  | -2.0303268 | 6.1530900  |
| H | 0.4361933  | -2.1912826 | 5.4246099  |
| H | 3.4751525  | -1.9316704 | 5.7666482  |
| H | 2.2712234  | -1.1792013 | 6.8120691  |
| C | 1.5726997  | 2.6216930  | 1.5731685  |
| H | 2.4206246  | 2.5150586  | 0.8948517  |
| H | 1.7326298  | 3.5572631  | 2.1228016  |
| H | 1.6295350  | -2.9480690 | 4.3866964  |
| H | 2.4119669  | -2.9417668 | 6.7532255  |

-----  
Lithiated 2-ferrocenyl-9,10-dihydro-9-n-butyl-10-(4-ethylbenzyl)-1,10-  
phenanthroline, Li at unsubstituted ring, in spacial proximity to N atoms  
-----

74

Energy = -2734.243807767

|    |            |            |            |
|----|------------|------------|------------|
| Fe | -1.0590343 | -2.4723581 | 0.1600777  |
| C  | -2.5322419 | -1.2092664 | -0.4690822 |
| H  | -2.5140362 | -0.7202308 | -1.4366785 |
| C  | -3.0535807 | -2.5201952 | -0.2676223 |
| H  | -3.4995904 | -3.1650977 | -1.0118207 |
| C  | -2.8330154 | -2.8451224 | 1.0949631  |
| H  | -3.0802507 | -3.7824085 | 1.5738312  |
| C  | -2.1839321 | -1.7221027 | 1.6893139  |
| H  | -1.8380485 | -1.7123200 | 2.7162273  |
| C  | -1.9686516 | -0.6701661 | 0.7383939  |
| Li | -0.3290731 | 0.4867593  | 0.6153094  |
| C  | 0.0362912  | -3.3342836 | -1.3442199 |
| C  | -0.0458832 | -4.2167458 | -0.2402764 |
| H  | -0.4874551 | -5.2013650 | -0.2502323 |
| C  | 0.5139093  | -3.5658120 | 0.8911037  |
| H  | 0.5826147  | -3.9760098 | 1.8860102  |
| C  | 0.9333666  | -2.2711209 | 0.4991129  |
| H  | 1.4087821  | -1.5333735 | 1.1287114  |
| C  | 0.6467194  | -2.1215520 | -0.8961241 |
| H  | -0.3432296 | -3.5229974 | -2.3370939 |
| N  | 0.7673207  | 0.2461650  | -1.0346440 |
| N  | 0.4819633  | 2.5357757  | 0.3986965  |
| C  | 0.8322978  | -0.9074535 | -1.6730423 |
| C  | 1.0489276  | -0.9573577 | -3.0733528 |
| H  | 1.1253912  | -1.9206245 | -3.5603617 |
| C  | 1.1585424  | 0.2025963  | -3.7804265 |

|   |            |            |            |
|---|------------|------------|------------|
| H | 1.3174643  | 0.1836953  | -4.8536496 |
| C | 1.0472839  | 1.4456148  | -3.1229834 |
| C | 0.8575044  | 1.4035607  | -1.7218898 |
| C | 1.0675183  | 2.6907416  | -3.7806762 |
| H | 1.2178400  | 2.7195188  | -4.8541195 |
| C | 0.8736246  | 3.8432086  | -3.0728120 |
| H | 0.8701330  | 4.8020176  | -3.5796868 |
| C | 0.6631233  | 3.8169756  | -1.6771746 |
| C | 0.6720149  | 2.6097764  | -1.0073737 |
| C | 0.4102627  | 5.0261387  | -0.9145332 |
| H | 0.5911479  | 5.9853261  | -1.3877100 |
| C | -0.0672314 | 4.9441673  | 0.3260820  |
| H | -0.2841895 | 5.8368950  | 0.9028201  |
| C | -0.3516775 | 3.6148891  | 0.9602552  |
| C | -1.8402342 | 3.2573507  | 0.9298525  |
| C | -2.4305812 | 2.9515609  | -0.4350933 |
| H | -2.3925396 | 4.0855127  | 1.3904402  |
| H | -1.9963991 | 2.3795843  | 1.5675121  |
| C | -3.9041409 | 2.5914362  | -0.3443524 |
| H | -1.9032492 | 2.1024607  | -0.8814701 |
| H | -2.2915712 | 3.8028250  | -1.1108915 |
| C | -4.5091361 | 2.2607230  | -1.6966292 |
| H | -4.4555110 | 3.4199084  | 0.1166810  |
| H | -4.0088640 | 1.7302867  | 0.3235864  |
| H | -4.4260674 | 3.1052879  | -2.3870928 |
| H | -5.5669896 | 2.0030522  | -1.6097275 |
| H | -3.9985566 | 1.4077131  | -2.1508588 |
| H | -0.0673459 | 3.6872113  | 2.0146014  |
| C | 1.6855433  | -0.6604137 | 4.2331591  |
| C | 0.5491923  | 0.0835186  | 3.9461657  |
| C | 0.5558853  | 1.0551682  | 2.9562943  |
| C | 1.7012768  | 1.3017431  | 2.2061426  |

|   |            |            |           |
|---|------------|------------|-----------|
| C | 2.8412603  | 0.5545404  | 2.4913066 |
| C | 2.8344964  | -0.4038315 | 3.4888594 |
| H | -0.3643066 | -0.0967033 | 4.5030283 |
| H | -0.3573235 | 1.6085675  | 2.7697125 |
| H | 3.7450290  | 0.7195403  | 1.9132213 |
| H | 3.7355212  | -0.9761274 | 3.6854058 |
| C | 1.6573417  | -1.7448548 | 5.2688165 |
| C | 1.2429934  | -3.0898494 | 4.6808646 |
| H | 2.6453923  | -1.8347156 | 5.7298716 |
| H | 0.2532913  | -3.0250302 | 4.2229583 |
| H | 1.9456422  | -3.4072711 | 3.9069861 |
| C | 1.7559467  | 2.3337650  | 1.1096618 |
| H | 2.5016544  | 2.0151239  | 0.3804505 |
| H | 2.1098540  | 3.2938456  | 1.5085208 |
| H | 0.9625560  | -1.4656316 | 6.0661464 |
| H | 1.2134794  | -3.8631609 | 5.4518193 |

-----  
Model Complex I  
-----

93

Energy = -3076.034126960

|    |            |            |           |
|----|------------|------------|-----------|
| Fe | -2.0086629 | -0.4106221 | 3.8444063 |
| C  | -2.1958758 | -1.3003571 | 2.0189339 |
| H  | -3.0424506 | -1.1672445 | 1.3631614 |
| C  | -2.0832558 | -2.2875768 | 3.0308450 |
| H  | -2.8212623 | -3.0390848 | 3.2665772 |
| C  | -0.8468694 | -2.0898131 | 3.7022429 |
| H  | -0.4800719 | -2.6683995 | 4.5362150 |
| C  | -0.1982511 | -0.9771969 | 3.1129546 |
| H  | 0.7434595  | -0.5438252 | 3.4074734 |
| C  | -1.0273832 | -0.4812528 | 2.0634605 |

|   |            |           |            |
|---|------------|-----------|------------|
| N | 0.1740811  | 1.5308093 | 1.7256372  |
| N | 2.2018882  | 3.2399641 | 2.7026838  |
| C | -0.7544027 | 0.7197922 | 1.2735293  |
| C | -1.4813022 | 0.9953877 | 0.0928478  |
| H | -2.2048884 | 0.2813031 | -0.2788767 |
| C | -1.2575997 | 2.1730740 | -0.5549855 |
| H | -1.8136985 | 2.4275928 | -1.4515125 |
| C | -0.3114465 | 3.0910140 | -0.0574724 |
| C | 0.4273406  | 2.6902158 | 1.0890221  |
| C | -0.1275316 | 4.3687653 | -0.6166718 |
| H | -0.6991327 | 4.6566620 | -1.4914123 |
| C | 0.7401125  | 5.2370498 | -0.0192015 |
| H | 0.8706248  | 6.2385954 | -0.4160355 |
| C | 1.4949089  | 4.8710354 | 1.1087274  |
| C | 1.4022376  | 3.5825109 | 1.6418961  |
| C | 2.3939996  | 5.8095012 | 1.7420858  |
| H | 2.5997856  | 6.7461909 | 1.2339087  |
| C | 2.9368425  | 5.5418789 | 2.9288834  |
| H | 3.6032369  | 6.2466765 | 3.4142023  |
| C | 2.6520407  | 4.2579108 | 3.6417752  |
| C | 1.6978004  | 4.4257620 | 4.8325228  |
| C | 0.2683956  | 4.7780681 | 4.4631579  |
| H | 2.1140566  | 5.2003658 | 5.4896158  |
| H | 1.7053979  | 3.4962459 | 5.4142277  |
| C | -0.6140210 | 5.0053096 | 5.6795163  |
| H | -0.1566329 | 3.9727172 | 3.8543923  |
| H | 0.2604593  | 5.6755577 | 3.8344386  |
| C | -2.0530039 | 5.3258354 | 5.3161315  |
| H | -0.1952125 | 5.8199475 | 6.2824240  |
| H | -0.5888596 | 4.1141496 | 6.3176315  |
| H | -2.1099901 | 6.2180880 | 4.6865364  |
| H | -2.6614727 | 5.5054815 | 6.2054600  |



|   |            |            |           |
|---|------------|------------|-----------|
| H | -2.5109442 | 4.5008274  | 4.7647006 |
| H | 3.6039553  | 3.8955351  | 4.0457210 |
| C | 7.0477788  | 1.7751511  | 2.8073775 |
| C | 6.3361977  | 1.1363601  | 3.8151939 |
| C | 4.9505844  | 1.1920548  | 3.8558969 |
| C | 4.2366472  | 1.8817994  | 2.8865427 |
| C | 4.9450384  | 2.5274922  | 1.8777875 |
| C | 6.3265869  | 2.4738597  | 1.8412418 |
| H | 6.8745996  | 0.5969148  | 4.5883260 |
| H | 4.4151725  | 0.6970526  | 4.6604583 |
| H | 4.4038307  | 3.0916113  | 1.1255959 |
| H | 6.8610743  | 2.9881559  | 1.0483518 |
| C | 8.5437943  | 1.6809587  | 2.7349826 |
| C | 9.0088448  | 0.5069452  | 1.8789489 |
| H | 8.9481289  | 2.6119122  | 2.3264579 |
| H | 8.6399250  | -0.4385594 | 2.2829942 |
| H | 8.6326751  | 0.5973252  | 0.8572986 |
| C | 2.7293505  | 1.9104312  | 2.9080785 |
| H | 2.3701644  | 1.4853934  | 3.8536175 |
| H | 2.3384223  | 1.2655229  | 2.1253566 |
| H | 8.9516716  | 1.5792636  | 3.7451568 |
| H | 10.0994326 | 0.4571027  | 1.8366050 |
| C | -7.1592028 | -0.1208655 | 8.8614798 |
| C | -7.1194587 | -1.4268401 | 8.3790580 |
| C | -6.2342348 | -1.7917635 | 7.3810581 |
| C | -5.3548903 | -0.8657921 | 6.8260350 |
| C | -5.3934782 | 0.4372170  | 7.3028421 |
| C | -6.2826300 | 0.8007950  | 8.3044483 |
| H | -7.7968452 | -2.1684089 | 8.7916812 |
| H | -6.2264471 | -2.8162793 | 7.0206817 |
| H | -4.7228108 | 1.1793985  | 6.8854769 |
| H | -6.2953328 | 1.8274431  | 8.6575567 |

|   |            |            |            |
|---|------------|------------|------------|
| C | -8.0846895 | 0.2613913  | 9.9795507  |
| C | -7.4750792 | 0.0000146  | 11.3531036 |
| H | -8.3430267 | 1.3208279  | 9.8912701  |
| H | -7.2288286 | -1.0575639 | 11.4748018 |
| H | -6.5519646 | 0.5697114  | 11.4827788 |
| C | -4.4081367 | -1.3036343 | 5.7322587  |
| H | -4.9950223 | -1.6713022 | 4.8838612  |
| H | -3.8311733 | -2.1627279 | 6.0909911  |
| H | -9.0205997 | -0.2976527 | 9.8852564  |
| H | -8.1649546 | 0.2821415  | 12.1521030 |
| C | -1.6469206 | 1.1575078  | 5.0922168  |
| H | -0.6716119 | 1.5946587  | 5.2405009  |
| C | -2.5769854 | 1.5298158  | 4.0872403  |
| H | -2.4252214 | 2.2911682  | 3.3373145  |
| C | -3.7019193 | 0.6704627  | 4.1928526  |
| H | -4.5735446 | 0.6825434  | 3.5553628  |
| C | -3.4727229 | -0.2461137 | 5.2580458  |
| C | -2.2011752 | 0.0679107  | 5.8159195  |
| H | -1.7299115 | -0.4607957 | 6.6311270  |

-----  
Model Complex II  
-----

96

Energy = -4123.733498101

|    |            |            |           |
|----|------------|------------|-----------|
| Fe | -0.7547402 | -0.6669600 | 3.8217688 |
| C  | -2.2774668 | 0.6709053  | 3.5024722 |
| H  | -2.4500610 | 1.2211955  | 2.5893215 |
| C  | -2.7984549 | -0.6073293 | 3.8302396 |
| H  | -3.4359409 | -1.2118029 | 3.2033327 |
| C  | -2.3033512 | -0.9665063 | 5.1121131 |
| H  | -2.5002615 | -1.8903800 | 5.6355200 |

|   |            |            |            |
|---|------------|------------|------------|
| C | -1.4664842 | 0.0849107  | 5.5806457  |
| C | -1.4612367 | 1.0964747  | 4.5800204  |
| H | -0.9263939 | 2.0323845  | 4.6310439  |
| C | -0.1737162 | -1.9445307 | 2.3419896  |
| H | -0.8509993 | -2.4224203 | 1.6510695  |
| C | 0.2148019  | -2.4596352 | 3.6025849  |
| H | -0.1117598 | -3.3953609 | 4.0293894  |
| C | 1.0706691  | -1.5102636 | 4.2230434  |
| H | 1.5139107  | -1.6018414 | 5.2030445  |
| C | 1.2092792  | -0.4022425 | 3.3556873  |
| H | 1.7824830  | 0.4908734  | 3.5388467  |
| C | 0.4428474  | -0.6646300 | 2.1788161  |
| N | 0.6157851  | 1.5212789  | 1.2819897  |
| N | 1.1037303  | 4.3847370  | 1.8751831  |
| C | 0.2432179  | 0.2707089  | 1.0813402  |
| C | -0.3389322 | -0.1405849 | -0.1352682 |
| H | -0.6208925 | -1.1749241 | -0.2800712 |
| C | -0.5229539 | 0.7832552  | -1.1209241 |
| H | -0.9588297 | 0.5012335  | -2.0731267 |
| C | -0.1583147 | 2.1241029  | -0.9136498 |
| C | 0.4016735  | 2.4464858  | 0.3467017  |
| C | -0.3509860 | 3.1094363  | -1.9080562 |
| H | -0.7888539 | 2.8177004  | -2.8554603 |
| C | 0.0048414  | 4.3941922  | -1.6756544 |
| H | -0.1304823 | 5.1558609  | -2.4332083 |
| C | 0.5416409  | 4.7925274  | -0.4260518 |
| C | 0.7105700  | 3.8401820  | 0.6187777  |
| C | 1.0694535  | 6.1354177  | -0.2764061 |
| H | 0.8487869  | 6.8511205  | -1.0591246 |
| C | 1.8439463  | 6.4468494  | 0.7558488  |
| H | 2.3002667  | 7.4254704  | 0.8430444  |
| C | 2.1242020  | 5.4742937  | 1.8462579  |

|   |            |            |           |
|---|------------|------------|-----------|
| C | 2.2756042  | 6.2039267  | 3.1796003 |
| C | 1.0609634  | 6.9866922  | 3.6396766 |
| H | 3.1218568  | 6.8858569  | 3.0354722 |
| H | 2.6012248  | 5.5047230  | 3.9522590 |
| C | 1.2857597  | 7.6729100  | 4.9765693 |
| H | 0.1889772  | 6.3319975  | 3.7210418 |
| H | 0.7935103  | 7.7349897  | 2.8848452 |
| C | 0.0626915  | 8.4443901  | 5.4403671 |
| H | 2.1496996  | 8.3453434  | 4.9083822 |
| H | 1.5489622  | 6.9178456  | 5.7267874 |
| H | -0.1943428 | 9.2353773  | 4.7308054 |
| H | 0.2266794  | 8.9107018  | 6.4144988 |
| H | -0.8045883 | 7.7846337  | 5.5206753 |
| H | 3.0890980  | 4.9839986  | 1.6441146 |
| C | 4.8664120  | 1.5582225  | 4.0796913 |
| C | 4.0235107  | 2.0706693  | 5.0608575 |
| C | 2.8693577  | 2.7554284  | 4.7209622 |
| C | 2.5107083  | 2.9358686  | 3.3894069 |
| C | 3.3581388  | 2.4402893  | 2.4065268 |
| C | 4.5196549  | 1.7680662  | 2.7493288 |
| H | 4.2772116  | 1.9345881  | 6.1074059 |
| H | 2.2258817  | 3.1463124  | 5.5033717 |
| H | 3.1028466  | 2.5534594  | 1.3598614 |
| H | 5.1642637  | 1.3843599  | 1.9650780 |
| C | 6.0784331  | 0.7548280  | 4.4464759 |
| C | 5.7455985  | -0.7220686 | 4.6372408 |
| H | 6.8371284  | 0.8609342  | 3.6656444 |
| H | 5.0095416  | -0.8548352 | 5.4335327 |
| H | 5.3220613  | -1.1469132 | 3.7244654 |
| C | 1.1818852  | 3.5599351  | 3.0905800 |
| H | 0.8732977  | 4.2048152  | 3.9130778 |
| H | 0.4345195  | 2.7775133  | 2.9973358 |

|    |            |            |            |
|----|------------|------------|------------|
| H  | 6.5164972  | 1.1526082  | 5.3665150  |
| H  | 6.6372586  | -1.2958057 | 4.8999660  |
| C  | -3.1517408 | 1.7026413  | 10.1417209 |
| C  | -2.3964026 | 0.5466418  | 10.2961320 |
| C  | -1.6377621 | 0.0442769  | 9.2494262  |
| C  | -1.6072685 | 0.6818799  | 8.0160390  |
| C  | -2.3690335 | 1.8357957  | 7.8556749  |
| C  | -3.1252139 | 2.3353733  | 8.9015948  |
| H  | -2.4076839 | 0.0249381  | 11.2481727 |
| H  | -1.0624534 | -0.8652451 | 9.3929599  |
| H  | -2.3839113 | 2.3427287  | 6.8971045  |
| H  | -3.7156381 | 3.2336146  | 8.7490338  |
| C  | -3.9387446 | 2.2764075  | 11.2837445 |
| C  | -3.1648464 | 3.3517629  | 12.0397154 |
| H  | -4.8734034 | 2.7006450  | 10.9047278 |
| H  | -2.2384757 | 2.9455765  | 12.4525929 |
| H  | -2.8964740 | 4.1767709  | 11.3758236 |
| C  | -0.7575419 | 0.1391043  | 6.8933871  |
| H  | -0.4096660 | -0.8607765 | 7.1653666  |
| H  | 0.1401369  | 0.7584019  | 6.7838010  |
| H  | -4.2157188 | 1.4737864  | 11.9733768 |
| H  | -3.7561169 | 3.7579135  | 12.8640276 |
| Pd | -1.0160168 | 4.7847328  | 1.4449164  |
| Cl | -1.9888903 | 5.0170253  | 3.4880216  |
| Cl | -2.9566558 | 4.6817069  | 0.3152713  |
